# Supplementary material for: Dietary L-Arginine or N-Carbamylglutamate Alleviates Colonic Barrier Injury, Oxidative Stress, and Inflammation by Modulation of Intestinal Microbiota in Intrauterine Growth-Retarded Suckling Lambs
Source: MDPI journal article supplement (doi:10.3390/antiox11112251), 2022-11-15
Supplement: s1 [file s1]

**Supplementary Table S1** Ingredient and nutrient composition of milk replacer (dry-matter basis, %)<sup>1</sup>.

| Item                                     | Milk replacer |
|------------------------------------------|---------------|
| Ingredients                              |               |
| Whey protein concentrate, 34% CP         | 30.00         |
| Milk fat powder, 11% CP                  | 35.00         |
| Whole milk powder                        | 20.00         |
| a-Casein                                 | 5.00          |
| Glucose                                  | 6.00          |
| Vitamin and mineral pre-mix <sup>2</sup> | 4.00          |
| Nutrient content (analyzed) <sup>3</sup> |               |
| GE, MJ/kg                                | 19.36         |
| CP, %                                    | 23.77         |
| EE, %                                    | 15.65         |
| Ash, %                                   | 7.64          |
| Lysine, %                                | 1.53          |
| Methionine, %                            | 0.41          |
| Threonine, %                             | 0.87          |
| L-arginine, %                            | 0.63          |
| Ca, %                                    | 0.99          |
| TP, %                                    | 0.73          |

<sup>1</sup>DM= dry matter; GE= gross energy; CP= crude protein; EE= ether extract; Ca=

calcium; TP= total phosphorus.

<sup>2</sup>Main contents of the pre-mixed mixture (per kg of the pre-mixed mixture): Cu (as  $\text{CuSO}_4 \cdot 5\text{H}_2\text{O}$ ) 600 mg; Mn ( $\text{MnSO}_4 \cdot \text{H}_2\text{O}$ ) 315 mg; Fe ( $\text{FeSO}_4 \cdot 7\text{H}_2\text{O}$ ) 8400 mg; Zn ( $\text{ZnSO}_4 \cdot 7\text{H}_2\text{O}$ ) 12500 mg; Se (as  $\text{Na}_2\text{SeO}_3$ ) 17 mg; vitamin A 55000 IU; vitamin E 400 IU; vitamin D 5500 IU; vitamin K 12.5 mg; biotin 2 mg; folacin 7.5 mg; choline 15 mg; riboflavin 100 mg; vitamin B<sub>6</sub> 175 mg; thiamin 317.5 mg; and vitamin B<sub>12</sub> 500 mg.

<sup>3</sup>Nutrient levels are all measured values.

**Supplementary Table S2** Primer sequences used in the real-time PCR<sup>1</sup>.

| Gene                           | Sequence (5'–3')                                           | GenBank accession number |
|--------------------------------|------------------------------------------------------------|--------------------------|
| Barrier function related genes |                                                            |                          |
| <i>ZO-1</i>                    | F: CGACCAGATCCTCAGGGTAA<br>R: AATCACCCACATCGGATTCT         | XM_015101949.1           |
| <i>Occludin</i>                | F: GTTCGACCAATGCTCTCTCAG<br>R: CAGCTCCCATTAAGGTTCCA        | XM_015101256.1           |
| <i>Claudin-1</i>               | F: CACCCTTGGCATGAAGTGTA<br>R: AGCCAATGAAGAGAGCCTGA         | NM_001185016.1           |
| Immune function-related genes  |                                                            |                          |
| <i>MyD88</i>                   | F: GCGAGGACGTGCTGATGGAAC<br>R: GATGCCTCCTGCTGCTGCTTC       | NM_001166183.1           |
| <i>TLR-4</i>                   | F: TGTGAAGGACATGCCAGTGCTTG<br>R: TGACAACCGACACGCTGATGATC   | NM_001135930.1           |
| <i>NF-<math>\kappa</math>B</i> | F: ATTCAGCCCTTTGCCCATCT<br>R: ATGGGATGTCAGTGGCGTTA         | EF121765.1               |
| <i>TNF-<math>\alpha</math></i> | F: GGGAACACAGACAGAGGGGACA<br>R: CCTGCGAGTAGATGAGGTAAAG     | EF446377.1               |
| <i>IL-1<math>\beta</math></i>  | F: CGTCTTCCTGGGACGTTTTAG<br>R: CTGCGTATGGCTTCTTTAGGG       | NM_001009465.2           |
| <i>IL-6</i>                    | F: GCAGACTACTTCTGACCACTCCA<br>R: TTTTCACACTCGTCATTCTTCTCAC | NM_001009392.1           |

---

*β-actin*

F: ATGAGGCTCAGAGCAAGAGA

NM\_001009784.3

R: ACACGCAGCTCGTTGTAGAA

---

<sup>1</sup>MyD88= myeloid differentiation factor 88; TLR= toll-like receptor; IL= interleukin,  
TNF-α= tumor necrosis factor α; NF-κB= nuclear factor kappa-B; ZO-1= zonula  
occludens-1.

**Supplementary Table S3** Effect of dietary Arg or NCG supplementation on oxidative status and mitochondrial ROS production in the colon of IUGR suckling lambs<sup>1</sup>.

| Item <sup>2</sup>                                 | CON               | IUGR              | IUGR + Arg        | IUGR + NCG        | SEM   | P value |
|---------------------------------------------------|-------------------|-------------------|-------------------|-------------------|-------|---------|
| ROS production, fold change                       | 1.00 <sup>c</sup> | 2.29 <sup>a</sup> | 1.58 <sup>b</sup> | 1.63 <sup>b</sup> | 0.112 | 0.008   |
| T-AOC, U/mg protein                               | 1.99 <sup>a</sup> | 1.21 <sup>c</sup> | 1.57 <sup>b</sup> | 1.51 <sup>b</sup> | 0.141 | 0.023   |
| MDA, nmol/mg protein                              | 0.35 <sup>c</sup> | 0.52 <sup>a</sup> | 0.47 <sup>b</sup> | 0.44 <sup>b</sup> | 0.038 | 0.009   |
| GSH-Px, U/mg protein                              | 15.3 <sup>a</sup> | 7.37 <sup>c</sup> | 10.2 <sup>b</sup> | 11.0 <sup>b</sup> | 1.03  | 0.012   |
| SOD, U/mg protein                                 | 111 <sup>a</sup>  | 57.9 <sup>c</sup> | 84.3 <sup>b</sup> | 109 <sup>a</sup>  | 5.39  | 0.005   |
| Protein carbonyl, nmol/mg protein                 | 1.87 <sup>c</sup> | 2.76 <sup>a</sup> | 2.21 <sup>b</sup> | 2.19 <sup>b</sup> | 0.132 | 0.017   |
| GR, U/g protein                                   | 4.13 <sup>c</sup> | 6.13 <sup>a</sup> | 4.98 <sup>b</sup> | 5.02 <sup>b</sup> | 0.356 | 0.028   |
| GSH, nmol/mg protein                              | 1.58 <sup>a</sup> | 0.81 <sup>c</sup> | 1.14 <sup>b</sup> | 1.19 <sup>b</sup> | 0.102 | 0.005   |
| GSSG, nmol/mg protein                             | 0.10              | 0.12              | 0.11              | 0.13              | 0.031 | 0.089   |
| GSH/GSSG                                          | 15.8 <sup>a</sup> | 6.75 <sup>c</sup> | 10.4 <sup>b</sup> | 9.16 <sup>b</sup> | 1.149 | 0.008   |
| H <sub>2</sub> O <sub>2</sub> , mmol/g of protein | 11.2 <sup>c</sup> | 18.3 <sup>a</sup> | 14.4 <sup>b</sup> | 14.6 <sup>b</sup> | 1.67  | 0.016   |

<sup>a,b,c</sup> Within a row, mean values without a common letter differ ( $P < 0.05$ ).

<sup>1</sup>Mean values with their SEM (n = 12 per group). These results have been published in our previous paper (Zhang et al., 2022).

<sup>2</sup>CON = the normal birth weight group given a control diet; GSH-Px = glutathione peroxidase; GR = glutathione reductase; GSH = reduced glutathione; GSSG = oxidized glutathione; H<sub>2</sub>O<sub>2</sub> = hydrogen peroxide; IUGR = the intrauterine-growth-retarded group given a control diet; IUGR + Arg = IUGR supplemented with 1% L-arginine; IUGR + NCG = IUGR supplemented with 0.1% N-carbamylglutamate; MDA = malondialdehyde; ROS = reactive oxygen species; SOD = superoxide dismutase; T-

AOC = total antioxidant capacity.
